# Supplementary material for: Global population structure and genotyping framework for genomic surveillance of the major dysentery pathogen, Shigella sonnei
Source: PubMed Central journal article supplement (PMC8113504; doi:10.1038/s41467-021-22700-4), 2021-05-11
Supplement: 41467_2021_22700_MOESM2_ESM.pdf [file 41467_2021_22700_MOESM2_ESM.pdf]

## Descriptions of Additional Supplementary Files

### **Supplementary Data 1**

**Description:** Metadata for all *S. sonnei* genomes used in this study.

### **Supplementary Data 2**

**Description:** Details for marker SNVs used for the genotyping scheme.

### **Supplementary Data 3**

**Description:** Genotyping data from a study of ESBL *S. sonnei* in Switzerland. The study by Campos-Madueno et al 2020 (Antimicrobial Agents and Chemotherapy, doi:10.1128/AAC.01057-20) examines 25 *S. sonnei* genomes isolated in Switzerland between 2016 and 2019, of which 14 were resistant to third-generation cephalosporins. Table gives the accessions for the corresponding genome assemblies; ESBL genes reported in each; summary of conclusions regarding clustering and lineage assignments drawn by the authors based on cgMLST and SNV tree analysis; and genotypes inferred from Mykrobe analysis of the genome assemblies, which replicate key findings (see Supplementary Text).
